# Supplementary material for: Joint Associations of Obesity and NT‐proBNP With the Incidence of Atrial Fibrillation in the ARIC Study
Source: PubMed Central journal article supplement — J Am Heart Assoc. 2019 Sep 28;8(19):e013294. doi: 10.1161/JAHA.119.013294 (PMC6806039; doi:10.1161/jaha.119.013294), 2019-09-28
Supplement: JAH3-8-e013294-s001.pdf [file JAH3-8-e013294-s001.pdf]

# **SUPPLEMENTAL MATERIAL**

**Table S1. Associations of BMI and NT-proBNP with incident AF in the ARIC cohort by sex and race.**

|        | <b>BMI &lt; 30 and<br/>NT-proBNP &lt;<br/>median</b> | <b>BMI ≥ 30 and<br/>NT-proBNP &lt;<br/>median</b> | <b>BMI &lt; 30 and<br/>NT-proBNP ≥<br/>median</b> | <b>BMI ≥ 30 and<br/>NT-proBNP ≥<br/>median</b> |
|--------|------------------------------------------------------|---------------------------------------------------|---------------------------------------------------|------------------------------------------------|
|        | <b>HR (95% confidence intervals)</b>                 |                                                   |                                                   |                                                |
| Men    | ref                                                  | 1.42<br>(1.15, 1.74)                              | 2.27<br>(1.90, 2.70)                              | 3.09<br>(2.51, 3.79)                           |
| Women  | ref                                                  | 1.64<br>(1.27, 2.12)                              | 2.11<br>(1.70, 2.62)                              | 2.99<br>(2.38, 3.79)                           |
| Blacks | ref                                                  | 1.22<br>(0.84, 1.76)                              | 2.74<br>(1.91, 3.95)                              | 2.96<br>(2.0, 4.30)                            |
| Whites | ref                                                  | 1.62<br>(1.36, 1.93)                              | 2.08<br>(1.80, 2.41)                              | 2.96<br>(2.52, 3.49)                           |

ARIC: Atherosclerosis Risk in Communities; BMI, body mass index; CI, confidence interval; HR, hazard ratio; NT-proBNP, N-terminal pro B-type natriuretic peptide; ref, reference.

Cox proportional hazards model adjusted for age, sex, center, race, standing height, smoking, education, drinking, diabetes mellitus, myocardial infarction, aspirin, statin, hypnotic drugs, LVH by Cornell definition, P wave terminal force in V1, systolic blood pressure.

**Table S2. Associations of changes in NT-proBNP and BMI between visit 2 (1990-92) and visit 4 (1996-98) with incident AF by sex and race in ARIC.**

|        | NT-proBNP ↓                              |                   | NT-proBNP ↑       |                   |
|--------|------------------------------------------|-------------------|-------------------|-------------------|
|        | BMI ↓                                    | BMI ↑             | BMI ↓             | BMI ↑             |
|        | Hazard ratios (95% confidence intervals) |                   |                   |                   |
| Men    | ref                                      | 0.89 (0.62, 1.28) | 1.57 (1.13, 2.20) | 1.68 (1.21, 2.33) |
| Women  | ref                                      | 1.09 (0.80, 1.48) | 1.60 (1.18, 2.17) | 1.70 (1.27, 2.27) |
| Blacks | ref                                      | 0.89 (0.63, 1.69) | 1.59 (0.99, 2.54) | 1.85 (1.19, 2.88) |
| Whites | ref                                      | 0.99 (0.76, 1.30) | 1.54 (1.19, 2.00) | 1.64 (1.28, 2.11) |

ARIC: Atherosclerosis Risk in Communities; BMI, body mass index; CI, confidence interval; HR, hazard ratio; NT-proBNP, N-terminal pro B-type natriuretic peptide; ref, reference.

Cox proportional hazards model adjusted for age, sex, BMI at visit 2, log (NT-ProBNP) at visit 2, race/center, height, smoking, education, drinking, diabetes mellitus, myocardial infarction, aspirin, statin, hypnotic drugs, PTFV1, systolic blood pressure and diastolic blood pressure.
